# Supplementary material
Source: MDPI journal article supplement (https://www.mdpi.com/1999-4907/8/7/260)
Supplement: s1 [file s1]

**Title:** Barriers to the adoption of alley cropping as a climate-smart agriculture practice: lessons from maize cultivation among the Maya in southern Belize

**Journal:** Forests

**Author:** Rico Kongsager

**Table S1. List of individuals and organizations interviewed in Belize**

| **Id** | **Affiliation and Interviewee’s Professional Position** | **Type of interview * and date** |
| --- | --- | --- |
|
| **Government and Multilateral Organizations** | |  |
| 1 | National Meteorological Service. Chief Meteorologist | In-depth interview 02/10/13 |
| 2 | Forestry Department (FD). REDD+ Coordinator | In-depth interview 12/09/13 |
| 3 | FD. Forest Officer, Forest Ecologist (Ph.D.) + technical expert for the auditing companies on the Bull Run (first auditor) and Boden Creek projects | Brief talk 31/10/13  In-depth interview 07/11/13 |
| 4 | FD. Former Chief Officer (now at CCCCC) | In-depth interview 07/11/13 |
| 5 | FD. Machaca Forest Station, Toledo. Forest Officer | Brief talk 06/12/13 |
| 6 | United Nations Development Programme (UNDP). Environmental Officer/Programme Officer | In-depth interview 16/09/13 |
| 7 | UNDP. The GEF Small Grants Programme. National Coordinator | In-depth interview 20/09/13 |
| 8 | The Caribbean Community Climate Change Centre (CCCCC). Executive Director | Preliminary interview 23/09/13 |
| 9 | CCCCC. Clearinghouse Manager/Information Systems Advisor | Brief talk 16/10/13 |
| 10 | Department of the Environment, Ministry of Natural Resources. Chief Environmental Officer + Galen University, Department of Environmental Science. Assistant Professor + formerly at Programme for Belize | In-depth interview 09/09/13 |
| 11 | Protected Areas Conservation Trust (PACT). Senior Grants Officer | In-depth interview 12/09/13 |
| 12 | Department of Agriculture. Chief Executive Officer | Interview 21/10/13  Follow up interview 06/03/14 |
| 13 | Department of Agriculture. Climate Change Officer | Interview 30/09/13 |
| 14 | Department of Agriculture, Toledo. Agricultural Officer | Interview 06/12/13 |
| 15 | Ministry of Forestry, Fisheries and Sustainable Development. Chief Executive Officer | In-depth interview 01/10/13 |
| 16 | National Climate Change Office in Ministry of Forestry, Fisheries and Sustainable Development. Climate Change Coordinator | In-depth interview 21/10/13 |
| 17 | Ministry Energy, Science, Technology & Public Utilities. Chief Executive Officer | In-depth interview 27/09/13 |
| 18 | Oak Foundation. Country Representative + Chair of Board at University of Belize | In-depth interview 17/10/13 |
| 19 | Caribbean Agriculture Research and Development Institute (CARDI). Country Representative | In-depth interview 30/09/13  Follow up interview 27/02/14 |
| 20 | Inter-American Institute for Cooperation on Agriculture (IICA). Country Representative | In-depth interview 17/09/13  Follow up interview 27/02/14 |
| 21 | Inter-American Development Bank (IDB). Country Representative | Interview 17/10/14 |
| 22 | IDB. Multilateral Investment Fund, General Operations. Consultant | In-depth interview 08/11/13 |
| **Academia** | |  |
| 23 | Environmental Research Institute (ERI), University of Belize. Science Director (Terrestrial), biologist (Ph.D.) | Brief talk 12/07/12 (by Skype)  Brief talk 14/12/12 (by Skype)  Preliminary interview 09/01/13  Interview 08/08/13  Brief talk 05/09/13 |
| 24 | ERI. Botanist | Informal talk 12/01/13 |
| 25 | ERI. Panthera Jaguar Research Fellow, Biologist (Ph.D.) | Brief talk 10/01/13  Brief talk 05/09/13 |
| 26 | ERI. Wildlife Biologist | Informal talk 10/01/13  Brief talk 05/09/13 |
| 27 | University of Belize (Punta Gorda), Faculty of Science and Technology. Assistant Professor, Faculty of Science and Technology (Hydrologist) | Preliminary interview 18/01/13  Informal talk 04/12/2013  Interview 11/12/13  Follow up interview 21/02/14 |
| 28 | Institute for Sustainable International Studies (ISIS). Researcher | In-depth interview 05/11/13 |
| 29 | Institute of Archeological (IAB). Head of IAB and Researcher | Informal talk 27+28/09/13 |
| 30 | Research, Development & Innovation Center, Central Farm. University of Belize. Crops Coordinator | Interview 21/10/13 |
| 31 | University of Belize, Belmopan. Assistant Professor, Anthropologist (Ph.D.) | In-depth interview 18/10/13  Follow up interview 27/02/14 |
| 32 | University of New Mexico. Department of Anthropology. Anthropologist (Ph.D.) | Brief talk 23/02/14 |
| 33 | University of Hawaii. Cacao agronomist and independent cacao consultant | Brief talk 31/01/14  Interview 04/02/14 |
| **NGOs** | |  |
| 34 | Belize Audubon Society (BAS). Conservation Director | In-depth interview 24/09/13 |
| 35 | BAS. 1st Director | In-depth interview 21/10/13 |
| 36 | Toledo Institute for Environment and Development (TIDE). Executive Director | In-depth interview 07/01/14 |
| 37 | Maya Leaders’ Alliance. Spokesperson | Interview 19/02/14 |
| 38 | Toledo Alcaldes Association (TAA). President | Interview 19/02/14 |
| 39 | Sustainable Harvest International (SHI). Country Director ( agricultural engineer and agronomist) | Informal interview 04/12/13  Interview 10/12/13  Brief talk 14/02/14 |
| 40 | SHI. Regional Coordinator | Interview 21/02/14 |
| 41 | Panthera. Country Director, Belize Jaguar Program, Wildlife Ecologist (Ph.D.) | Brief talk 10/01/13  Brief talk 05/09/13 |
| 42 | Ya´axche Conservation Trust (YCT). Executive Director | In-depth interview 05/02/14 |
| 43 | YCT. Protected Areas Management program Director | Preliminary interview 17/01/13  In-depth interview 04/12/13  Informal talk 09/12/13  Informal talk 26/01/14 |
| 44 | YCT. Sustainable Land Use Officer | Informal talk 17/01/13  Informal talk 09/12/13  Informal talk 23/01/14  Brief talk 05/02/14 |
| 45 | YCT. Research Coordinator | Informal talk 09/12/13 |
| 46 | YCT. Community Outreach Officer | In-depth interview 16/12/13  Informal talk 23/01/14 |
| 47 | YCT. Education & Outreach Coordinator | Informal talk 12+22/02/14 |
| 48 | YCT. Senior Research Coordinator | Informal talk 09/12/13 |
| 49 | YCT Head Ranger + Community Council Member (Indian Creek) | Interview 16/12/13 |
| 50 | Friends for Conservation and Development (FCD). Executive Director | In-depth interview 05/11/13 |
| 51 | Help for Progress. Project Coordinator | Brief talk 16/09/13 |
| 52 | Belize Enterprise for Sustainable Technology (BEST). Deputy Managing Director | In-depth interview 23/09/13 |
| 53 | Sarstoon Temash Institute for Indigenous Management (SATIIM). Executive Director | In-depth interview 17/01/14 |
| 54 | Community Baboon Sanctuary. Leader of Women’s Conservation Group | Interview 08/11/13 |
| 55 | Corozal Sustainable Future Initiative (CSFI). Executive Director | In-depth interview 23/11/13 (by Skype) |
| 56 | Itzamna Society. One of the five Gracia Sisters | Interview 23/10/13 |
| 57 | Community Conservation, Inc. Director (established the Community Baboon Sanctuary), zoologist (Ph.D.) | In-depth interview 02/10/13 (by Skype) |
| 58 | Monkey Bay Wildlife Sanctuary. Managing Director. Former Environmental Program Manager of the US Peace Corps in Belize | Interview 07/11/13 (by Skype) |
| 59 | The Belize Wildlife & Referral Clinic (BWRC) co-founder. Professor of Wildlife Medicine | Interview 30/09/13 |
| 59a | Slate Creek Preserve. Spokesperson | Interview 28/10/13 |
| 60 | Hillside Clinic. Medical Director | Interview 26/01/14 |
| 61 | Plenty Belize. Executive Director | Interview 18/02/14 |
| 62 | Maya Mountain Research Farm. Founder and owner | Interview 20/02/14 |
| 63 | Nature´s Way and Toledo Ecotourism Association (TEA). Owner | Interview 21/02/14 |
| 64 | Toledo Teachers Credit Union. Microcredit Officer | Interview 31/01/14 |
| **Farmers’ Organizations** | |  |
| 65 | Maya Mountain Cocoa (MMC). Managing Director | Preliminary interview 18/01/13  Interview 14/02/14 |
| 66 | MMC. Cacao agronomist (former Research Intern at World Agroforestry Centre) | Brief talk 07+12/12/13 |
| 67 | MMC. Extension Officer (San Jose) | Interview 13/02/14 |
| 68 | Toledo Cacao Growers Association (TCGA). Technical Advisor | Interview 15/01/14  Brief talk 05/02/14  Interview 18/02/14 |
| 69 | TCGA. Extension Officer (San Jose) | Interview 13/02/14 |
| **Others** | |  |
| 70 | International Consultant, Sustainable Solutions, Economic Integration, Agriculture And Rural Development Specialist. Former CEO in Ministry of Agriculture. Carried out Vulnerability Assessment of the Agriculture Sector in the 2nd National Communication to UNFCCC for Belize | In-depth interview 09/11/13 |
| 71 | International Consultant (local biologist). Biodiversity & Environmental Resource Data System (BERDS). | In-depth interview 08/09/13  Interview 04/10/13 |
| 72 | Independent Consultant at IDEAS (Integrating Development, Environment and Sustainability). Agronomist and founder of Belize Enterprise for Sustained Technology (BEST). Carried out Vulnerability Assessment of the Agriculture Sector in the 2nd National Communication to UNFCCC for Belize | Preliminary interview 12/09/13  In-depth interview 25/09/13 |
| 73 | Independent Consultant in the Land Use Change and Forestry Sector. Former Chief Forest Officer, Forest Department | In-depth interview 17/09/13 |
| 74 | Independent Consultant. Board member at PACT (representing Belize Tourism Industry Association) and Corozal Sustainable Future Initiative (CSFI). Former Protected Areas Manager and Executive Director of the Belize Audubon Society + Forest Department as Chief Forest Officer | In-depth interview 08/11/13  Informal talk 20/11/13  Interview 29/01/14  Informal talk 30/01/14 |
| 75 | Former Protected Area Manager (for BAS) at Cockscomb Basin Wildlife Sanctuary + has served as Maya Centre Village Council Chairman for more than 20 years | In-depth interview 30/11/13 |
| 76 | Independent Consultant (Teakettle). Former head of UNDP Belize | Informal talks 08/08/13 → 28/02/14 |
| 77 | Riversdale Limited (Monkey River). Banana Farm. Manager | Interview 10/12/13  Informal talk 03/01/14  Informal talk 17/02/14 |
| 78 | British Development Officer (Big Falls. Has lived in Toledo District for more than 50 years | Informal talk 23/02/14 |
| 79 | Tropical Foods (Orange Walk). Papaya Farm. Owner | Interview 18/11/13 |
| 80 | Blue Creek (Orange Walk). Community Council Member | Informal talks 11+13+19/11/13 |
| 81 | Dairy farmer (Blue Creek, Toledo) and teacher (technical high school in Mafredi) | Interview and farm visit 22/01/14  Interview and farm visit 08/02/14 |
| 82 | Cattle farmers (and landscape architect), Sirmoor Hill Farm (outside Punta Gorda) | Interview and farm visit 04/02/14 |
| 83 | Toledo Farm Supply (Punta Gorda). Manager | Interview 10/02/14 |
| **Local authorities and farmers in Mayan villages** | |  |
| 84 | Big Falls farmer enrolled in alley cropping project together with Ya’axche | Interview and farm visit 12/02/14 |
| 85 | Crique Sarco. Alcalde (traditional village leader) | Village survey and interview 24/01/14  Interview 16/02/14 |
| 86 | Crique Sarco. Farmers (~10) ** | Interviews and farm visits 24/01/14  Interviews and farm visits 01/02/14 |
| 87 | Crique Sarco (~30) | Community meeting 16/02/14 |
| 88 | San Jose. Chairman | Village survey and interview 26/01/14 |
| 89 | San Jose. Farmers (~10) ** | Interviews and farm visits 26/01/14  Interviews and farm visits 13/02/14 |
| 90 | San Jose (~15) | Community meeting 09/02/14 |
| 91 | Jalacte. Chairman and Alcalde (~ traditional village leader) | Village survey and interview 02/02/14 |
| 92 | Jalacte. Farmers (~10) ** | Interviews and farm visits 02/02/14  Interviews and farm visits 22/02/14 |
| 93 | Jalacte (~20) | Community meeting 23/02/14 |
| 94 | Indian Creek. Alcalde (~ traditional village leader) | Interview 16/12/13 |
| **Local authorities and farmers in other farming communities** | |  |
| 95 | Seven Miles (El Progresso). Chairperson | Village survey and interview 10/09/13 |
| 96 | Upper Barton Creek. Chairperson | Village survey and interview 18/09/13 |
| 97 | San Carlos. Chairperson | Village survey and interview 10/11/13 |
| 98 | San Carlos. Chairperson of Farmer Cooperative | Interview 14/11/13 |
| 99 | San Felipe. Chairperson | Village survey and interview 10/11/13 |
| 100 | Pine Hill. Chairperson | Village survey and interview 03/02/14 |

***Interview types**

| Brief talk | A brief talk (5-15 min), mainly about the research topic. Often casual encounters. |
| --- | --- |
| Informal talk | An informal talk about various things (e.g. the historical development of Belize). The research topic is only touched on slightly or not at all. Used to obtain general and background information about different issues in Belize. |
| Preliminary interview | A short interview (5-15 min). First, to inform the interviewee about the research and to judge if he/she was in possession of knowledge that would contribute to the research in any way. Second, to make an appointment for an interview or in-depth interview. |
| Interview | Mainly medium to long interviews (15-60 min). The conversation was mainly centered on parts of the research topic that the person had knowledge about, but other, more general issues were also discussed. |
| In-depth interview | Mainly longer interviews of around one hour, but varying between 15 min and 2 hours. All were audio recorded. A semi-structured method was applied, and all the questions, more or less, were centered on the research topic. However, the emphasis was on questions related to that particular person (education, affiliation, past experience, etc.). |
| Community meeting | Meetings with villagers were held in the village (duration: ~60min). First, the perceived farming system was presented to test whether the most distinct features of the system had been understood correctly. Secondly, the suggested adjustments were introduced to obtain feedback directly from the farmers. Projector and PowerPoint were used, and the meetings were held in the community house. |
| Village survey | Applied in six buffering communities to obtain general knowledge about geography, demography, infrastructure, agriculture and livestock farming, use of forest products, and the impact of the project on the community. |

** A semi-random approach was applied, meaning means that the data collector went to villages and questioned producers as he found them.
